# Supplementary material
Source: PubMed Central journal article supplement (PMC6824498)
Supplement: supp_RA119000277_154453_1_supp_379631_pwqkx2.pdf [file supp_RA119000277_154453_1_supp_379631_pwqkx2.pdf]

## Male

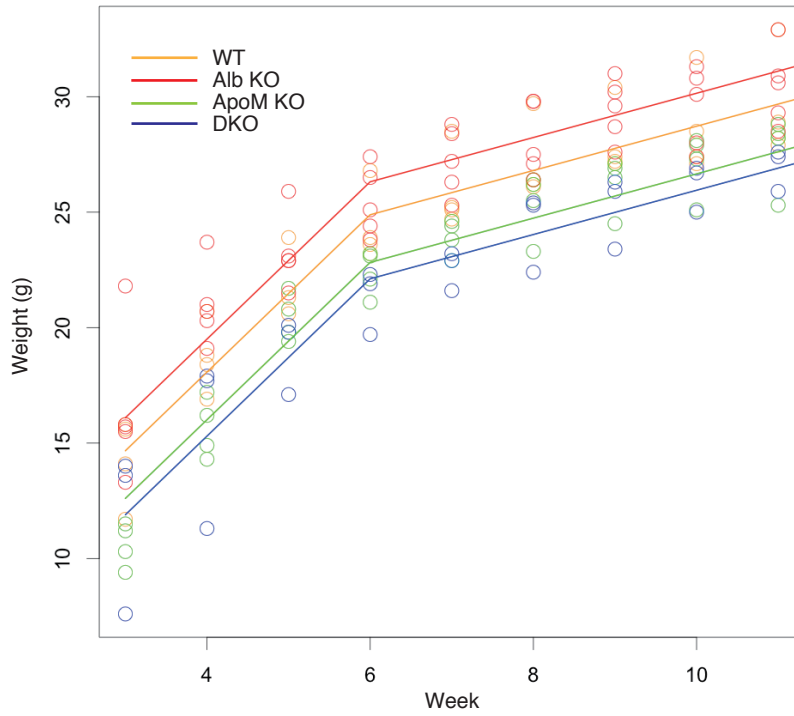

## Female

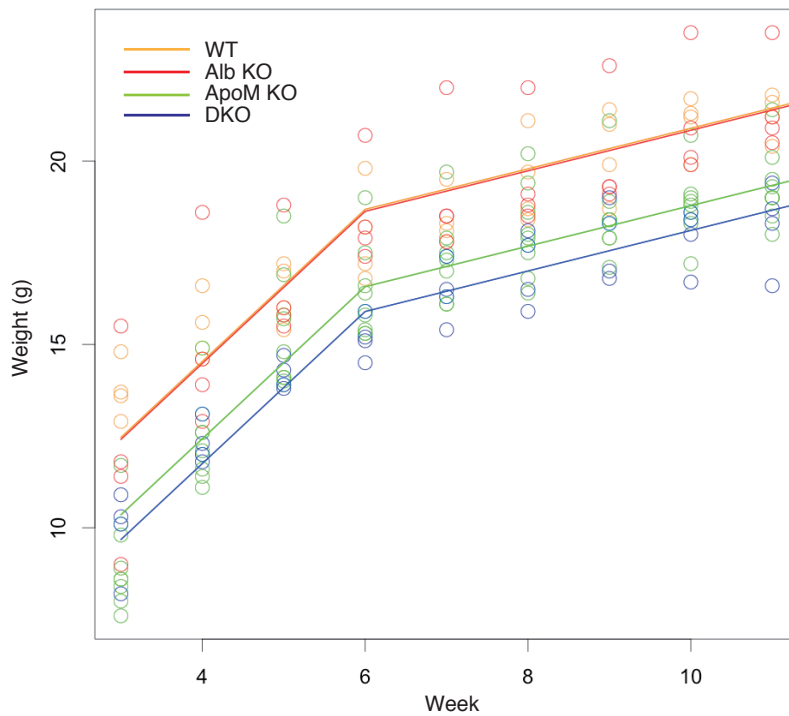

### Supplemental

Figure S1. Multiple linear regression model to examine the statistical differences of the growth curves between the four genotype groups

In order to express the non-linear time trend of the growth curves, a spline-based function was used, and the location of the knot was optimized for minimizing the residual standard errors, which resulted in the regression model with  $R^2 = 0.907$  and  $0.863$  for the male and female group, respectively.

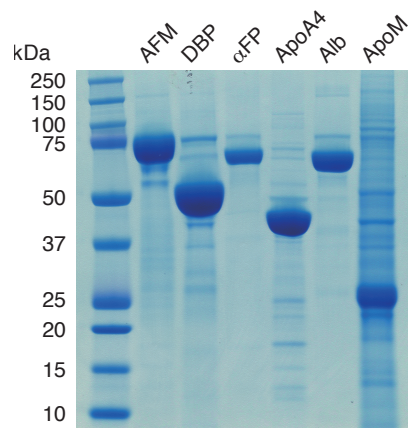

## Supplemental

### Figure S2. SDS-PAGE analysis of the recombinant proteins

Purified recombinant proteins were separated by SDS-PAGE with a 4-12% precast gel and revealed by Coomassie Brilliant Blue staining.

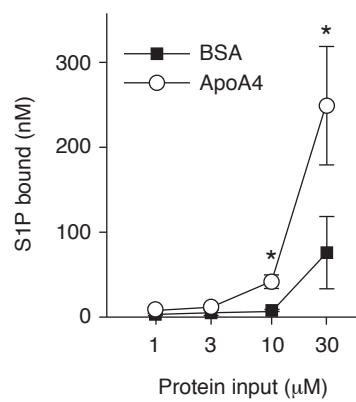

### Supplemental

Figure S3. Close-up comparison between ApoA4 and albumin in the S1P-binding capacity

Fig.6B is enlarged to show the close-up comparison between ApoA4 and albumin. ApoA4 showed significantly higher S1P-binding capacity at 10 and 30 µM (Student's t-test,  $p < 0.05$ ).

A.

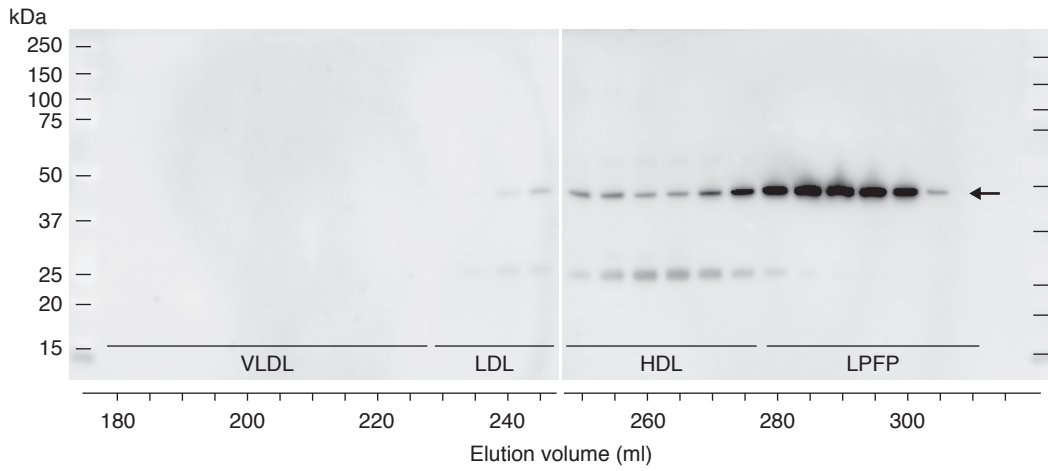

B.

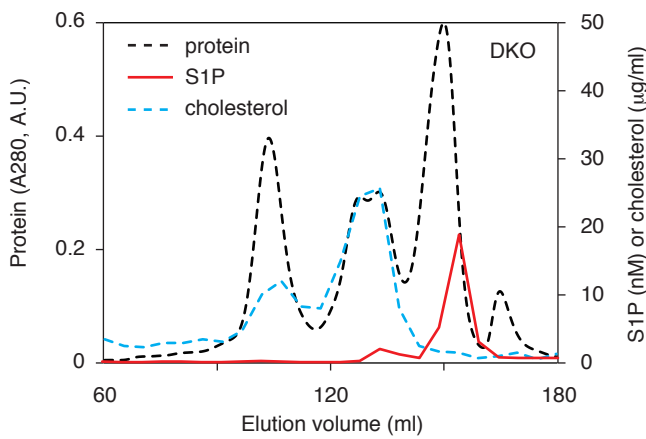

C.

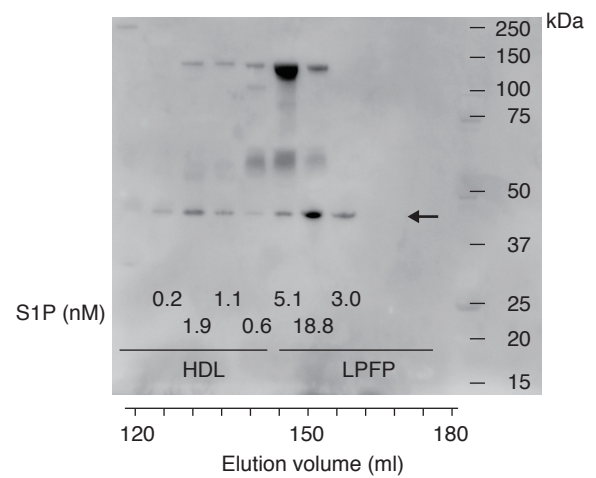

D.

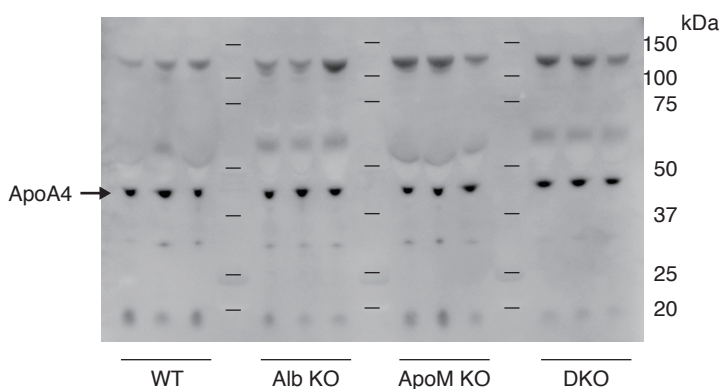

E.

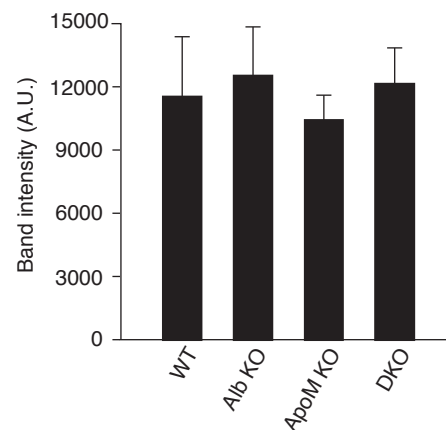

## Supplemental

### Figure S4. ApoA4 distribution in human and mouse plasma

(A) Human plasma (1 ml) or (B) plasma from the DKO mice (0.5 ml) was separated by size exclusion chromatography with tandemly-connected Superose™6 and Superdex™200 columns (16 mm x 600 mm each). ApoA4 distribution was revealed by western blot analysis (A, C). S1P concentration in each fraction of the DKO plasma was determined and shown (B, C). Plasma (1 µl) from each genotype of mice was separated by SDS-PAGE with a 4-12% precast gel, and ApoA4 was revealed by western blot analysis (D). Intensity of each ApoA4 band was quantified by using ImageJ software (E).

A.

phospho/total ERK<sub>1/2</sub>

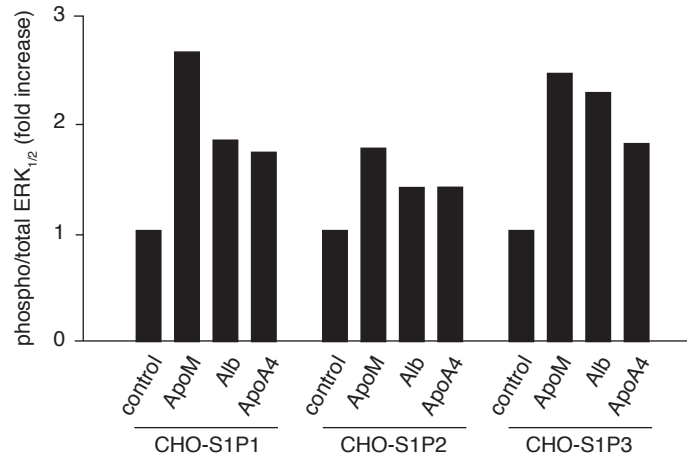

phospho/total Akt

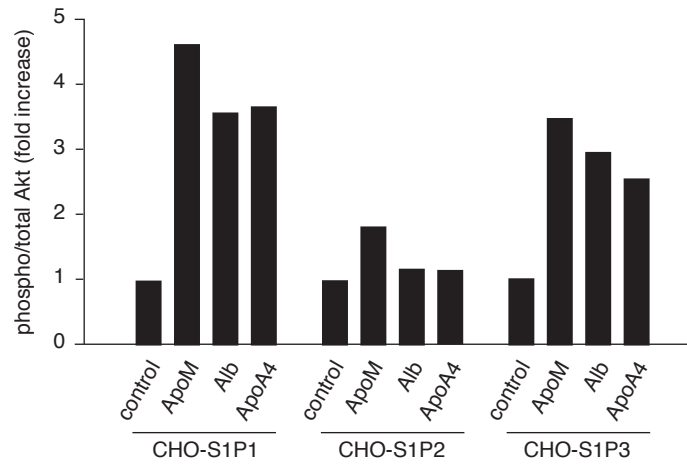

B.

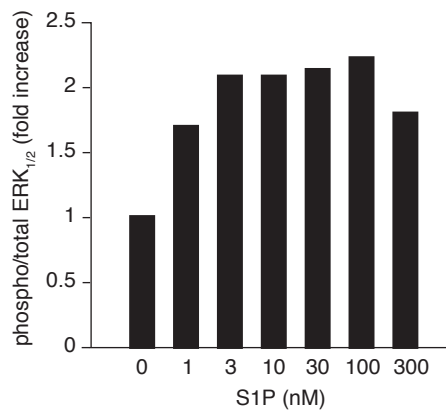

Supplemental

Figure S5. Activation of S1P receptors by ApoA4-bound S1P

Intensity of each band in Fig.7A and 7B was quantified by using ImageJ software and shown in S5A and S5B, respectively.

## Supplemental

Table S1. Protein list identified by the shot-gun proteomic analysis

The tryptic digests from Fig.5B were subjected to the shot-gun proteomic analysis by the nano LC-MS/MS system. The raw data were analyzed by Mascot search engine (Matrix Science) referring to the SwissProt Knowledgebase to identify the proteins. The identified proteins in each gel piece are listed. Proteins with more than 5 distinct peptides assigned are shown. Keratin species were omitted from the list. pep\_#, number of distinct peptides assigned for each protein. cover\_%, percentage of coverage of each protein assigned.

| gel # | score | protein name                    | accession # | pep_# | cover_% |
|-------|-------|---------------------------------|-------------|-------|---------|
| 1     | 1435  | Ceruloplasmin                   | Q61147      | 24    | 26.6    |
|       | 1019  | Serine protease inhibitor A3K   | P07759      | 10    | 27.8    |
| 2     | 2119  | Serine protease inhibitor A3K   | P07759      | 11    | 25.8    |
|       | 1137  | Serine protease inhibitor A3M   | Q03734      | 10    | 20.8    |
|       | 93    | Alpha-1-antitrypsin1-4          | Q00897      | 6     | 15.3    |
|       | 78    | Alpha-1-antitrypsin1-1          | P07758      | 7     | 17.2    |
|       | 52    | Ceruloplasmin                   | Q61147      | 6     | 6.1     |
| 3     | 1247  | Serine protease inhibitor A3K   | P07759      | 8     | 15.3    |
|       | 709   | Serine protease inhibitor A3M   | Q03734      | 9     | 18.7    |
| 4     | 924   | Serine protease inhibitor A3K   | P07759      | 7     | 16.5    |
|       | 62    | Plasminogen                     | P20918      | 8     | 11.3    |
| 5     | 1371  | Gelsolin                        | P13020      | 22    | 27.3    |
|       | 1096  | Serine protease inhibitor A3K   | P07759      | 9     | 20.3    |
|       | 350   | Plasminogen                     | P20918      | 18    | 23.5    |
| 6     | 999   | Serine protease inhibitor A3K   | P07759      | 6     | 13.9    |
|       | 125   | Afamin                          | O89020      | 12    | 17.9    |
|       | 34    | Ceruloplasmin                   | Q61147      | 6     | 6.9     |
|       | 28    | Heparin cofactor 2              | P49182      | 6     | 10.5    |
| 7     | 1253  | Serine protease inhibitor A3K   | P07759      | 7     | 14.1    |
|       | 402   | Carboxylesterase 1C             | P23953      | 6     | 10.5    |
|       | 294   | Heparin cofactor 2              | P49182      | 8     | 13.8    |
|       | 181   | Serotransferrin                 | Q92111      | 17    | 25.8    |
|       | 146   | Afamin                          | O89020      | 8     | 10.9    |
| 8     | 1673  | Serine protease inhibitor A3K   | P07759      | 9     | 16.0    |
|       | 673   | Heparin cofactor 2              | P49182      | 15    | 28.7    |
|       | 353   | Alpha-1-antitrypsin1-1          | P07758      | 6     | 12.6    |
|       | 345   | Alpha-1-antitrypsin1-4          | Q00897      | 7     | 15.5    |
|       | 161   | Alpha-2-antiplasmin             | Q61247      | 8     | 16.7    |
|       | 100   | Complement component C9         | P06683      | 6     | 9.3     |
|       | 77    | Antithrombin-III                | P32261      | 10    | 22.4    |
|       | 35    | Corticosteroid-binding globulin | Q06770      | 6     | 13.6    |

Supplemental  
Table S1. (continued)

| gel # | score | protein name                      | accession # | pep_# | cover_% |
|-------|-------|-----------------------------------|-------------|-------|---------|
| 9     | 3368  | Alpha-1-antitrypsin1-1            | P07758      | 17    | 39.5    |
|       | 3267  | Alpha-1-antitrypsin1-4            | Q00897      | 17    | 33.7    |
|       | 2960  | Alpha-1-antitrypsin1-2            | P22599      | 16    | 37.0    |
|       | 2561  | Serine protease inhibitor A3K     | P07759      | 13    | 32.1    |
|       | 2262  | Alpha-1-antitrypsin1-5            | Q00898      | 14    | 36.1    |
|       | 1170  | Serine protease inhibitor A3M     | Q03734      | 9     | 22.2    |
|       | 513   | Serine protease inhibitor A3N     | Q91WP6      | 6     | 14.1    |
|       | 134   | Antithrombin-III                  | P32261      | 7     | 18.5    |
| 10    | 3246  | Alpha-1-antitrypsin1-2            | P22599      | 16    | 37.0    |
|       | 3067  | Alpha-1-antitrypsin1-1            | P07758      | 17    | 39.5    |
|       | 2616  | Alpha-1-antitrypsin1-5            | Q00898      | 15    | 39.2    |
|       | 2592  | Alpha-1-antitrypsin1-4            | Q00897      | 16    | 33.7    |
|       | 1525  | Serine protease inhibitor A3K     | P07759      | 12    | 31.8    |
|       | 797   | Serine protease inhibitor A3M     | Q03734      | 8     | 22.0    |
|       | 385   | Serine protease inhibitor A3N     | Q91WP6      | 7     | 20.6    |
| 11    | 718   | Serine protease inhibitor A3K     | P07759      | 10    | 23.0    |
|       | 593   | Serine protease inhibitor A3M     | Q03734      | 13    | 27.3    |
|       | 520   | Alpha-1-antitrypsin1-1            | P07758      | 11    | 29.1    |
|       | 390   | Alpha-1-antitrypsin1-4            | Q00897      | 9     | 26.4    |
|       | 374   | Alpha-1-antitrypsin1-2            | P22599      | 8     | 22.5    |
|       | 246   | Alpha-1-antitrypsin1-5            | Q00898      | 6     | 13.6    |
|       | 126   | Apolipoprotein A-IV               | P06728      | 8     | 22.3    |
|       | 105   | Pigment epithelium-derived factor | P97298      | 7     | 18.5    |
|       | 79    | Vitamin D-binding protein         | P21614      | 6     | 12.4    |
| 12    | 1182  | Alpha-1-antitrypsin1-2            | P22599      | 11    | 23.0    |
|       | 1141  | Alpha-1-antitrypsin1-1            | P07758      | 11    | 20.1    |
|       | 834   | Alpha-1-antitrypsin1-4            | Q00897      | 8     | 17.9    |
|       | 542   | Alpha-1-antitrypsin1-5            | Q00898      | 8     | 15.0    |
